# Supplementary material
Source: MDPI journal article supplement (https://www.mdpi.com/2076-3417/13/7/4289)
Supplement: s1 [file s1]

**Table S1.** List of media and of their composition.

| Medium                  | Composition        | Concentration | Source       | Stock Number |
|-------------------------|--------------------|---------------|--------------|--------------|
| Neural Induction Medium | DMEM F-12          |               | ThermoFisher | 31330038     |
|                         | GlutaMAX           | 1:100         | ThermoFisher | 35050038     |
|                         | MEM NEEA           | 1:100         | ThermoFisher | 11140050     |
|                         | 2-Mercaptoethanol  | 1:1000        | ThermoFisher | 21985023     |
|                         | Human Insulin      | 25mg/mL       | Sigma Merck  | I3536        |
|                         | SB431542           | 10mM          | Tocris       | 1614/10      |
|                         | LDN193189          | 250nM         | Tocris       | 6053/10      |
|                         | Retinoic Acid      | 100nM         | Sigma Merck  | R2625        |
|                         | PenStrep           | 1:100         | Sigma Merck  | P4333        |
| N2 Medium               | DMEM F-12          |               | ThermoFisher | 31330038     |
|                         | GlutaMAX           | 1:100         | ThermoFisher | 35050038     |
|                         | MEM NEEA           | 1:100         | ThermoFisher | 11140050     |
|                         | 2-Mercaptoethanol  | 1:1000        | ThermoFisher | 21985023     |
|                         | N2 supplement      | 1:100         | ThermoFisher | 17502001     |
|                         | Smoothened agonist | 1mM           | Tocris       | 6390/1       |
|                         | Retinoic Acid      | 100nM         | Sigma Merck  | R2625        |
|                         | PenStrep           | 1:100         | Sigma Merck  | P4333        |
| N2B27 Medium            | DMEM F-12          |               | ThermoFisher | 31330038     |
|                         | GlutaMAX           | 1:100         | ThermoFisher | 35050038     |
|                         | MEM NEEA           | 1:100         | ThermoFisher | 11140050     |
|                         | 2-Mercaptoethanol  | 1:1000        | ThermoFisher | 21985023     |
|                         | Human Insulin      | 1:100         | Sigma Merck  | I3536        |
|                         | N2 supplement      | 1:100         | ThermoFisher | 17502001     |
|                         | B27 supplement     | 1:50          | ThermoFisher | 17504044     |
|                         | Smoothened agonist | 1mM           | Tocris       | 6390/1       |
|                         | Retinoic Acid      | 100nM         | Sigma Merck  | R2625        |
|                         | PenStrep           | 1:100         | Sigma Merck  | P4333        |
| PDGF Medium             | DMEM F-12          |               | ThermoFisher | 31330038     |
|                         | GlutaMAX           | 1:100         | ThermoFisher | 35050038     |
|                         | MEM NEEA           | 1:100         | ThermoFisher | 11140050     |
|                         | 2-Mercaptoethanol  | 1:1000        | ThermoFisher | 21985023     |
|                         | Human Insulin      | 1:100         | Sigma Merck  | I3536        |
|                         | N2 supplement      | 1:100         | ThermoFisher | 17502001     |
|                         | B27 supplement     | 1:50          | ThermoFisher | 17504044     |
|                         | PDGFaa             | 10ng/mL       | ThermoFisher | PHG0035      |
|                         | IGF-1              | 10ng/mL       | ThermoFisher | PHG0078      |
|                         | HGF                | 5ng/mL        | ThermoFisher | PHG0254      |
|                         | NT3                | 10ng/mL       | ThermoFisher | PHC7036      |
|                         | T3                 | 60ng/mL       | Sigma Merck  | T2877        |
|                         | Biotin             | 100ng/mL      | Sigma Merck  | B4639        |
|                         | cAMP               | 1mM           | Sigma Merck  | A9501        |
|                         | PenStrep           | 1:100         | Sigma Merck  | P4333        |

**Table S2.** List of primary and secondary antibodies used to stain plated cells.

| Antigen Name              | Host   | Dilution | Source                 | Stock Number |
|---------------------------|--------|----------|------------------------|--------------|
| <b>Primary antisera</b>   |        |          |                        |              |
| CD49f                     | Rat    | 1:100    | Biologend              | 313602       |
| GFAP                      | Mouse  | 1:400    | Sigma Merck            | MAB360       |
| AQP4                      | Rabbit | 1:1000   | Sigma Merck            | HPA014784    |
| LMNB1                     | Rabbit | 1:1000   | Abcam                  | AB16048      |
| <b>Secondary antisera</b> |        |          |                        |              |
| AlexaFluor488 Anti-Rt     | Donkey | 1:400    | Jackson ImmunoResearch | 712-545-153  |
| Cy3 Anti-Ms               | Donkey | 1:800    | Jackson ImmunoResearch | 715-165-151  |
| AlexaFluor647 Anti-Rb     | Donkey | 1:800    | Jackson ImmunoResearch | 711-605-152  |

**Table S3.** List of the predictors we used to estimate the LMNB class of the nucleus. The columns indicate from left to right: the Predictor name, a short description of the predictor, the type (quantitative = Q or categorical = C), the unit, the range, and the standard error. Legend. a.u. = arbitrary unit.

| Predictive Feature   | Description                                      | Type | Unit            | Range or Class Types | IQR   | S.E.   | N. Missing Observations |
|----------------------|--------------------------------------------------|------|-----------------|----------------------|-------|--------|-------------------------|
| GFAP                 | positive/negative for GFAP expression            | C    | NA              | 0/1                  | NA    | NA     | 2 (1%)                  |
| Cell Morphology      | Type of morphology                               | C    | NA              | 0/1/2/3              | NA    | NA     | 0(0%)                   |
| nRamifications       | Number of axonal ramifications                   | Q    | NA              | 0-18                 | NA    | NA     | 0 (0%)                  |
| Cellular Area        | Area occupied by the cell (soma + ramifications) | Q    | $\mu\text{m}^2$ | 170-11710            | 2421  | 156.17 | 10(5%)                  |
| Soma Area            | Area occupied by the soma                        | Q    | $\mu\text{m}^2$ | 141-916              | 162.9 | 17.27  | 191(93%)                |
| Nuclear Area         | Area of the Nucleus                              | Q    | $\mu\text{m}^2$ | 55-383               | 70.55 | 4.23   | 0(0%)                   |
| Norm. Intensity LMNB | z-score normalized Integrated density LMNB       | Q    | a.u.            | -1.06-1.09           | 0.64  | 0.03   | 0(0%)                   |
| Norm. Intensity GFAP | z-score normalized integrated density of GFAP    | Q    | a.u.            | -0.56-2.38           | 0.73  | 0.06   | 178(92%)                |
